# Supplementary material
Source: Springer Nature journal article supplement (https://publikationen.ub.uni-frankfurt.de/files/868/12860_2007_21_MOESM3_ESM.pdf)

aphidicolin

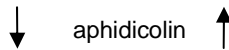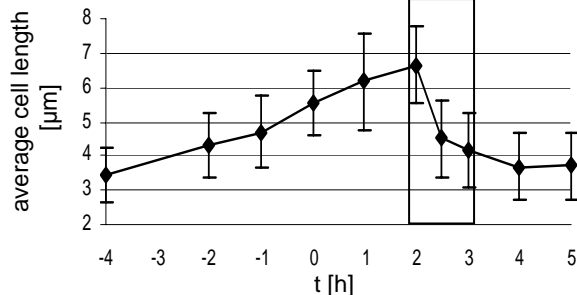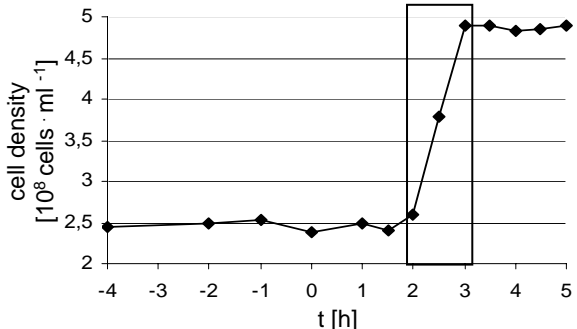

Supplement: MOESM3 [file 12860_2007_21_MOESM3_ESM.pdf]
